# Supplementary material for: METTL3 facilitates immunosurveillance by inhibiting YTHDF2-mediated NLRC5 mRNA degradation in endometrial cancer
Source: PubMed Central journal article supplement (PMC10122371; doi:10.1186/s40364-023-00479-4), 2023-04-21
Supplement: 40364_2023_479_MOESM2_ESM.pdf [file 40364_2023_479_MOESM2_ESM.pdf]

This document certifies that the manuscript

**METTTL3 facilitates immunosurveillance by inhibiting YTHDF2-mediated NLRC5 mRNA degradation to activate interferon- $\beta$  in endometrial cancer**

prepared by the authors

**Lei Zhan**

was edited for proper English language, grammar, punctuation, spelling, and overall style by one or more of the highly qualified native English speaking editors at SNAS.

This certificate was issued on **November 29, 2022** and may be verified on the [SNAS website](#) using the verification code **OAFB-CD02-E58F-778A-D203**.

Neither the research content nor the authors' intentions were altered in any way during the editing process. Documents receiving this certification should be English-ready for publication; however, the author has the ability to accept or reject our suggestions and changes. To verify the final

SNAS edited version, please visit our verification page at [secure.authorservices.springernature.com/certificate/verify](https://secure.authorservices.springernature.com/certificate/verify).

If you have any questions or concerns about this edited document, please contact SNAS at [support@as.springernature.com](mailto:support@as.springernature.com).
